# Supplementary material for: Association of PIP4K2A Polymorphisms with Alcohol Use Disorder
Source: MDPI journal article supplement (doi:10.3390/genes12101642), 2021-10-19
Supplement: s1 [file s1]

We did not find any significant differences for *PIP4K2A* rs8341, rs943190, rs1132816, rs1417374, and rs11013052 (Supplement tables 1-5).

**Supplement Table S1.** The comparison of *PIP4K2A* rs8341 genotypes and alleles distribution in men with AUD and healthy men.

| Genotypes/<br>Alleles | Patients with AUD<br>(n=279) | Controls<br>(n=223) | $\chi^2$ , p                        | OR   | 95% CI |      |
|-----------------------|------------------------------|---------------------|-------------------------------------|------|--------|------|
| CC                    | 127 (45.52 %)                | 94 (42.15 %)        | $\chi^2_1 = 1.46$ ,<br>$p_1 = 0.48$ | 1.15 | 0.80   | 1.64 |
| CT                    | 117 (41.94 %)                | 93 (41.70 %)        |                                     | 1.01 | 0.71   | 1.44 |
| TT                    | 35 (12.54 %)                 | 36 (16.14 %)        |                                     | 0.75 | 0.45   | 1.23 |
| C                     | 371 (66.49 %)                | 281 (63.00 %)       | $\chi^2_1 = 1.32$ ,<br>$p_1 = 0.25$ | 1.16 | 0.90   | 1.51 |
| T                     | 187 (33.51 %)                | 165 (37.00 %)       |                                     | 0.86 | 0.66   | 1.11 |

**Supplement Table S2.** The comparison of *PIP4K2A* rs943190 genotypes and alleles distribution in men with AUD and healthy men.

| Genotypes/<br>Alleles | Patients with AUD<br>(n=256) | Controls<br>(n=220) | $\chi^2$ , p                        | OR   | 95% CI |      |
|-----------------------|------------------------------|---------------------|-------------------------------------|------|--------|------|
| CC                    | 30 (11.72 %)                 | 33 (15.00 %)        | $\chi^2_1 = 1.22$ ,<br>$p_1 = 0.54$ | 0.75 | 0.44   | 1.28 |
| CT                    | 116 (45.31 %)                | 99 (45.00 %)        |                                     | 1.01 | 0.71   | 1.45 |
| TT                    | 110 (42.97 %)                | 88 (40.00 %)        |                                     | 1.13 | 0.78   | 1.63 |
| C                     | 176 (34.38 %)                | 165 (37.5 %)        | $\chi^2_1 = 1.00$ ,<br>$p_1 = 0.32$ | 0.87 | 0.67   | 1.14 |
| T                     | 336 (65.63 %)                | 275 (62.5 %)        |                                     | 1.15 | 0.88   | 1.49 |

**Supplement Table S3.** The comparison of *PIP4K2A* rs1132816 genotypes and alleles distribution in men with AUD and healthy men.

| Genotypes/<br>Alleles | Patients with AUD<br>(n=254) | Controls<br>(n=219) | $\chi^2$ , p                        | OR   | 95% CI |      |
|-----------------------|------------------------------|---------------------|-------------------------------------|------|--------|------|
| AA                    | 148 (58.27 %)                | 118 (53.88 %)       | $\chi^2_1 = 2.04$ ,<br>$p_1 = 0.36$ | 1.20 | 0.83   | 1.72 |
| AG                    | 89 (35.04 %)                 | 79 (36.07 %)        |                                     | 0.96 | 0.66   | 1.39 |
| GG                    | 17 (6.69 %)                  | 22 (10.04 %)        |                                     | 0.64 | 0.33   | 1.24 |
| A                     | 287 (77.99 %)                | 315 (71.92 %)       | $\chi^2_1 = 1.83$ ,<br>$p_1 = 0.18$ | 1.22 | 0.91   | 1.63 |
| G                     | 81 (22.01 %)                 | 123 (28.08 %)       |                                     | 0.82 | 0.61   | 1.09 |

**Supplement Table S4.** The comparison of *PIP4K2A* rs1417374 genotypes and alleles distribution in men with AUD and healthy men.

| Genotypes/<br>Alleles | Patients with AUD<br>(n=239) | Controls<br>(n=216) | $\chi^2$ , p                        | OR   | 95% CI |      |
|-----------------------|------------------------------|---------------------|-------------------------------------|------|--------|------|
| AA                    | 14 (5.86 %)                  | 22 (10.18 %)        | $\chi^2_1 = 3.16$<br>$p_1 = 0.07$   | 0.55 | 0.27   | 1.10 |
| AG                    | 111 (46.44 %)                | 91 (42.13 %)        |                                     | 1.19 | 0.82   | 1.73 |
| GG                    | 114 (47.70 %)                | 103 (47.68 %)       |                                     | 1.00 | 0.69   | 1.45 |
| A                     | 139 (29.08 %)                | 135 (31.25 %)       | $\chi^2_1 = 5.08$ ,<br>$p_1 = 0.02$ | 0.90 | 0.68   | 1.20 |
| G                     | 339 (70.92 %)                | 297 (68.75 %)       |                                     | 1.11 | 0.83   | 1.47 |

**Supplement Table S5.** The comparison of *PIP4K2A* rs11013052 genotypes and alleles distribution in men with AUD and healthy men.

| Genotypes/<br>Alleles | Patients with AUD<br>(n=77) | Controls<br>(n=127) | $\chi^2$ , p                         | OR   | 95% CI |      |
|-----------------------|-----------------------------|---------------------|--------------------------------------|------|--------|------|
| AA                    | 6 (7.79 %)                  | 10 (7.87 %)         | $\chi^2_1 = 1.174$<br>$p_1 = 0.28$   | 0.99 | 0.34   | 2.84 |
| AC                    | 25 (32.47 %)                | 50 (39.37 %)        |                                      | 0.74 | 0.41   | 1.34 |
| CC                    | 46 (59.74 %)                | 67 (52.76 %)        |                                      | 1.33 | 0.75   | 2.36 |
| A                     | 37 (24.03 %)                | 70 (27.56 %)        | $\chi^2_1 = 0.697$ ,<br>$p_1 = 0.40$ | 0.83 | 0.52   | 1.32 |
| C                     | 117 (75.97 %)               | 184 (72.44 %)       |                                      | 1.20 | 0.76   | 1.91 |
